# Supplementary material for: Formation of 1-ethynyl-1H-silole from the reaction of silicon atoms with benzene: matrix infrared spectroscopy and quantum chemical calculations
Source: Royal Society of Chemistry journal article supplement (doi:10.1039/d1cp05245d), 2022-01-01
Supplement: d1cp05245d1.pdf [file d1cp05245d1.pdf]

## Supporting Information

### Formation of 1-Ethynyl-1H-Silole from Reaction of Silicon Atoms with Benzene: Matrix Infrared Spectroscopy and Quantum Chemical Calculations

Danyang Li, Jiaping Xu, Xin Xu, Wenshao Yang\*, Jiwen Jian\*,

Table of Contents:

|                                                                                                 |       |
|-------------------------------------------------------------------------------------------------|-------|
| Observed and Calculated frequencies of species <b>A</b> and <b>B</b> (Table S1-S2).....         | 2-3   |
| Observed and Calculated frequencies of <b>C</b> Complexes (Table S3-S4).....                    | 4-5   |
| Calculated vibrational frequencies and intensities of species <b>C isomer1</b> (Table S5) ..... | 6     |
| Infrared spectra of product species <b>B</b> (Figure S1-S2).....                                | 7-8   |
| Infrared spectra of boron with isotopically labeled benzene (Figure S3) .....                   | 9     |
| Optimized structures of species <b>A-C</b> and isomers (Figure S4) .....                        | 10    |
| Experimental and computed <b>C</b> isomers spectrum (Figure S5-S6).....                         | 11    |
| Optimized structures of the intermediates and transition states (Figure S7).....                | 12    |
| The calculated electronic absorptions spectra (Figure S8) .....                                 | 13    |
| Calculated atomic coordinates of Species <b>A-C</b> and <b>C</b> isomer (Table S6).....         | 14-15 |

**Table S1.** Comparison of the observed and calculated harmonic vibrational frequencies, intensities (in Parentheses) of the Si[ $\eta^2(1,4)$ -C<sub>6</sub>H<sub>6</sub>] complex (A) and seven-membered ring cyc-SiC<sub>6</sub>H<sub>6</sub> species (B).

| Si[ $\eta^2(1,4)$ -C <sub>6</sub> H <sub>6</sub> ]                                                                                                                             |                    |             |                    | cyc-SiC <sub>6</sub> H <sub>6</sub> |                    |             |                    |
|--------------------------------------------------------------------------------------------------------------------------------------------------------------------------------|--------------------|-------------|--------------------|-------------------------------------|--------------------|-------------|--------------------|
| exptl                                                                                                                                                                          | exptl <sup>a</sup> | calcd       | calcd <sup>a</sup> | exptl                               | exptl <sup>a</sup> | calcd       | calcd <sup>a</sup> |
| 1600.2                                                                                                                                                                         | 1599.3             | 1653.2 (23) | 1649.1 (22)        | ---                                 | 1475.9             | 1509.2 (88) | 1508.9 (94)        |
| 1456.2                                                                                                                                                                         | 1465.5             | 1493.9 (9)  | 1492.9 (9)         | 1398.2                              | 1389.3             | 1431.6 (91) | 1428.2 (95)        |
| 1328.5                                                                                                                                                                         | 1338.3             | 1372.7 (13) | 1367.9 (11)        | 613.6                               | 618.5              | 633.2 (43)  | 629.0 (55)         |
| 1267.4 (site)                                                                                                                                                                  | 1261.1             | 1289.8 (24) | 1289.9 (26)        | 592.2                               | 596.4              | 592.5 (56)  | 591.9 (56)         |
| 1262.6                                                                                                                                                                         |                    |             |                    |                                     |                    |             |                    |
| 954.3                                                                                                                                                                          | 953.5              | 967.1 (39)  | 972.6 (45)         |                                     |                    |             |                    |
| 925.7                                                                                                                                                                          | 924.6              | 931.6 (10)  | 931.7 (8)          |                                     |                    |             |                    |
| 849.6                                                                                                                                                                          | 851.0              | 866.3 (59)  | 862.9 (64)         |                                     |                    |             |                    |
| 836.5                                                                                                                                                                          | 836.8              | 847.2 (19)  | 846.8 (20)         |                                     |                    |             |                    |
| 712.4                                                                                                                                                                          | 713.9              | 731.9 (29)  | 728.0 (32)         |                                     |                    |             |                    |
| 503.7                                                                                                                                                                          | 502.8              | 492.9 (28)  | 492.9 (30)         |                                     |                    |             |                    |
| [ <sup>a</sup> ] The IR data previously observed by Reisenauer et al. in solid argon. [ <sup>ref. 28</sup> ] The calculated IR intensities are listed in parentheses in km/mol |                    |             |                    |                                     |                    |             |                    |

**Table S2.** Calculated vibrational frequencies of species **A** and **B**. The calculated IR intensities are listed in parentheses in km/mol

| <b>A</b>           | <b>B</b>           |
|--------------------|--------------------|
| 3195.4 (20)        | 3154.4 (29)        |
| 3189.8 (14)        | 3133.7 (13)        |
| 3176.1 (10)        | 3097.1 (4)         |
| 3171.3 (5)         | 3095.8 (72)        |
| 3153.7 (1)         | 3068.5 (0)         |
| 3151.6 (17)        | 3067.3 (12)        |
| <b>1653.2 (23)</b> | 1638.8 (5)         |
| <b>1493.9 (9)</b>  | 1594.5 (2)         |
| <b>1372.7 (13)</b> | <b>1509.2 (88)</b> |
| 1349.3 (6)         | 1502.7 (8)         |
| 1314.0 (0)         | <b>1431.6 (91)</b> |
| <b>1289.8 (24)</b> | 1415.5 (0)         |
| 1131.7 (2)         | 1319.8 (4)         |
| 1109.6 (0)         | 1284.5 (2)         |
| 1053.9 (1)         | 1252.6 (1)         |
| 1030.9 (1)         | 1069.8 (0)         |
| 1022.7 (2)         | 1061.7 (2)         |
| 973.6 (0)          | 1051.7 (0)         |
| <b>967.1 (39)</b>  | 1036.6 (0)         |
| <b>931.6 (10)</b>  | 896.3 (1)          |
| 926.4 (0)          | 885.7 (3)          |
| 879.1 (3)          | 881.1 (1)          |
| <b>866.3 (59)</b>  | 828.7 (0)          |
| <b>847.2 (19)</b>  | 722.9 (13)         |
| <b>731.9 (29)</b>  | <b>633.2 (43)</b>  |
| 701.4 (3)          | 630.7 (4)          |
| 612.7 (0)          | <b>592.5 (56)</b>  |
| 584.6 (0)          | 548.9 (0)          |
| <b>492.9 (28)</b>  | 372.3 (0)          |
| 461.4 (1)          | 358.9 (0)          |
| 411.9 (0)          | 330.6 (4)          |
| 346.0 (0)          | 170.8 (0)          |
| 297.0 (3)          | 84.6 (1)           |

**Table S3.** Experimental and Calculated Harmonic Vibrational Frequencies, Intensities (in Parentheses), and Isotopic Frequency Ratios of the 1-ethynyl-1H-silole (**C**).

|          | Exp                           |                                             |                               |                                  |        | Cal                           |                                             |                               |                                  |        |
|----------|-------------------------------|---------------------------------------------|-------------------------------|----------------------------------|--------|-------------------------------|---------------------------------------------|-------------------------------|----------------------------------|--------|
|          | C <sub>6</sub> H <sub>6</sub> | <sup>13</sup> C <sub>6</sub> H <sub>6</sub> | C <sub>6</sub> D <sub>6</sub> | <sup>12</sup> C/ <sup>13</sup> C | H/D    | C <sub>6</sub> H <sub>6</sub> | <sup>13</sup> C <sub>6</sub> H <sub>6</sub> | C <sub>6</sub> D <sub>6</sub> | <sup>12</sup> C/ <sup>13</sup> C | H/D    |
| <b>C</b> | 3313.2                        | 3296.6                                      | 2611.5                        | 1.0050                           | 1.2687 | 3455.0 (50)                   | 3436.5                                      | 2686.8                        | 1.0054                           | 1.2859 |
|          | 2176.9                        | 2177.2                                      | 1583.2                        | 0.9999                           | 1.3750 | 2214.4 (94)                   | 2214.4                                      | 1592.7                        | 1.0000                           | 1.3903 |
|          | 2053.8                        | 1980.8                                      | 1927.3                        | 1.0368                           | 1.0656 | 2143.7 (26)                   | 2066.9                                      | 1995.7                        | 1.0372                           | 1.0742 |
|          | 866.3                         | 849.9                                       | 725.3                         | 1.0193                           | 1.1944 | 872.1 (59)                    | 853.9                                       | 731.5                         | 1.0213                           | 1.1922 |
|          | 823.6                         | 820.4                                       | 636.5                         | 1.0039                           | 1.2939 | 824.3 (239)                   | 821.2                                       | 688.7                         | 1.0038                           | 1.1969 |
|          | 723.9                         | 716.5                                       | 602.8                         | 1.0103                           | 1.2009 | 725.8 (35)                    | 718.9                                       | 576.4                         | 1.0096                           | 1.2592 |
|          | 681.4                         | 678.0                                       | --                            | 1.0050                           | --     | 695.3 (104)                   | 691.4                                       | 541.3                         | 1.0056                           | 1.2845 |
|          | 643.4                         | 629.1                                       | --                            | 1.0227                           | --     | 638.4 (60)                    | 625.1                                       | 584.5                         | 1.0213                           | 1.0922 |

**Table S4.** Comparison of the observed and calculated vibrational frequencies, intensities (in parentheses, w=weak, m=moderate, s=strong), and isotopic frequency of the 1-ethynyl-1H-silole (C).

| $C_6H_6$           | $^{13}C_6H_6$      | $C_6D_6$           | Exptl             |
|--------------------|--------------------|--------------------|-------------------|
| <b>3455.0 (50)</b> | <b>3436.5 (51)</b> | <b>2686.8 (14)</b> | <b>3313.2 (w)</b> |
| 3204.3 (3)         | 3193.6 (2)         | 2375.8 (5)         |                   |
| 3203.1 (5)         | 3192.5 (5)         | 2372.3 (1)         |                   |
| 3151.1 (32)        | 3141.1 (32)        | 2324.7 (14)        |                   |
| 3136.6 (9)         | 3127.0 (9)         | 2314.8 (6)         |                   |
| <b>2214.4 (94)</b> | <b>2214.3 (94)</b> | <b>1592.7 (59)</b> | <b>2176.9 (m)</b> |
| <b>2143.7 (26)</b> | <b>2066.9 (23)</b> | <b>1995.7 (42)</b> | <b>2053.8 (m)</b> |
| 1617.5 (2)         | 1561.9 (2)         | 1563.4 (4)         |                   |
| 1541.6 (11)        | 1483.2 (10)        | 1519.3 (9)         |                   |
| 1368.4 (11)        | 1346.9 (11)        | 1186.5 (8)         |                   |
| 1315.9 (3)         | 1300.0 (4)         | 1071.0 (1)         |                   |
| 1118.7 (2)         | 1111.1 (1)         | 875.8 (19)         |                   |
| 1107.8 (10)        | 1105.6 (10)        | 797.4 (13)         |                   |
| 1009.2 (1)         | 1000.8 (1)         | 792.3 (4)          |                   |
| 1006.7 (0)         | 995.6 (0)          | 829.5 (0)          |                   |
| 941.5 (13)         | 916.1 (13)         | 837.2 (32)         |                   |
| <b>872.1 (59)</b>  | <b>853.9 (60)</b>  | <b>731.5 (24)</b>  | <b>866.3 (m)</b>  |
| <b>824.3 (239)</b> | <b>821.2 (238)</b> | <b>688.7 (112)</b> | <b>823.6 (s)</b>  |
| 761.9 (0)          | 753.0 (0)          | 602.4 (0)          |                   |
| 756.2 (9)          | 738.3 (11)         | 639.4 (95)         |                   |
| <b>725.8 (35)</b>  | <b>719.0 (35)</b>  | <b>576.4 (14)</b>  | <b>723.9 (w)</b>  |
| <b>719.0 (41)</b>  | <b>712.3 (44)</b>  | <b>565.6 (8)</b>   |                   |
| 697.8 (4)          | 691.8 (3)          | 522.6 (4)          |                   |
| <b>695.3 (104)</b> | <b>691.4 (95)</b>  | <b>541.3 (92)</b>  | <b>681.4 (w)</b>  |
| <b>638.4 (60)</b>  | <b>625.1 (57)</b>  | <b>584.5 (3)</b>   | <b>643.3 (w)</b>  |
| 618.6 (3)          | 602.7 (3)          | 600.6 (5)          |                   |
| 489.8 (20)         | 481.2 (20)         | 451.0 (3)          |                   |
| 447.0 (6)          | 435.0 (5)          | 392.1 (10)         |                   |
| 391.5 (5)          | 378.5 (4)          | 366.0 (3)          |                   |
| 305.8 (9)          | 296.7 (8)          | 274.9 (6)          |                   |
| 252.7 (4)          | 244.7 (4)          | 230.0 (3)          |                   |
| 115.8 (1)          | 112.8 (1)          | 104.5 (0)          |                   |
| 91.4 (1)           | 89.2 (0)           | 84.6 (0)           |                   |

**Table S5.** Calculated vibrational frequencies, intensities (in Parentheses), and isotopic frequency of the 2-ethynyl-2H-silole Complexes (**C-isomer1**).

| <b>C<sub>6</sub>H<sub>6</sub></b> | <b><sup>13</sup>C<sub>6</sub>H<sub>6</sub></b> | <b>C<sub>6</sub>D<sub>6</sub></b> |
|-----------------------------------|------------------------------------------------|-----------------------------------|
| <b>3467.7 (100)</b>               | <b>3449.6 (96)</b>                             | <b>2691.1 (86)</b>                |
| 3201.8 (3)                        | 3191.2 (3)                                     | 2371.8 (2)                        |
| 3162.4 (18)                       | 3152.2 (18)                                    | 2337.4 (9)                        |
| 3143.1 (16)                       | 3133.4 (16)                                    | 2319.5 (12)                       |
| <b>2223.9 (90)</b>                | <b>2223.9 (90)</b>                             | <b>1607.4 (55)</b>                |
| <b>2220.4 (86)</b>                | <b>2220.4 (86)</b>                             | <b>1589.1 (56)</b>                |
| <b>2178.2 (21)</b>                | <b>2099.1 (20)</b>                             | <b>2042.0 (3)</b>                 |
| 1608.4 (2)                        | 1553.3 (2)                                     | 1562.0 (1)                        |
| 1527.4 (5)                        | 1469.8 (4)                                     | 1509.8 (5)                        |
| 1357.2 (9)                        | 1335.5 (9)                                     | 1190.9 (5)                        |
| 1287.3 (3)                        | 1271.7 (3)                                     | 1032.7 (1)                        |
| 1181.0 (4)                        | 1148.8 (3)                                     | 1150.0 (4)                        |
| 1090.5 (9)                        | 1075.8 (11)                                    | 862.4 (19)                        |
| 1009.2 (0)                        | 999.2 (1)                                      | 825.9 (0)                         |
| 998.7 (5)                         | 973.2 (9)                                      | 796.6 (1)                         |
| <b>942.0 (90)</b>                 | <b>940.9 (86)</b>                              | <b>687.6 (65)</b>                 |
| 935.1 (11)                        | 923.3 (13)                                     | 765.0 (0)                         |
| <b>845.8 (74)</b>                 | <b>830.9 (75)</b>                              | <b>715.2 (30)</b>                 |
| <b>747.1 (84)</b>                 | <b>741.6 (83)</b>                              | <b>585.0 (39)</b>                 |
| 719.4 (8)                         | 710.8 (5)                                      | 552.8 (12)                        |
| <b>688.6 (19)</b>                 | <b>681.9 (17)</b>                              | <b>570.2 (43)</b>                 |
| <b>649.7 (43)</b>                 | <b>644.5 (43)</b>                              | <b>513.0 (12)</b>                 |
| <b>641.6 (44)</b>                 | <b>635.9 (43)</b>                              | <b>490.6 (14)</b>                 |
| 633.8 (1)                         | 615.9 (2)                                      | <b>612.7 (0)</b>                  |
| 616.7 (2)                         | 598.6 (3)                                      | 590.2 (0)                         |
| 606.1 (11)                        | 596.2 (13)                                     | 514.8 (6)                         |
| 465.3 (19)                        | 454.6 (18)                                     | 435.4 (24)                        |
| 455.0 (6)                         | 443.1 (5)                                      | 396.1 (12)                        |
| 429.0 (3)                         | 416.7 (2)                                      | 412.1 (0)                         |
| 391.0 (1)                         | 383.4 (1)                                      | 311.9 (1)                         |
| 247.7 (2)                         | 242.3 (2)                                      | 204.8 (1)                         |
| 145.6 (1)                         | 141.8 (1)                                      | 133.5 (1)                         |
| 140.6 (1)                         | 136.3 (1)                                      | 127.4 (1)                         |

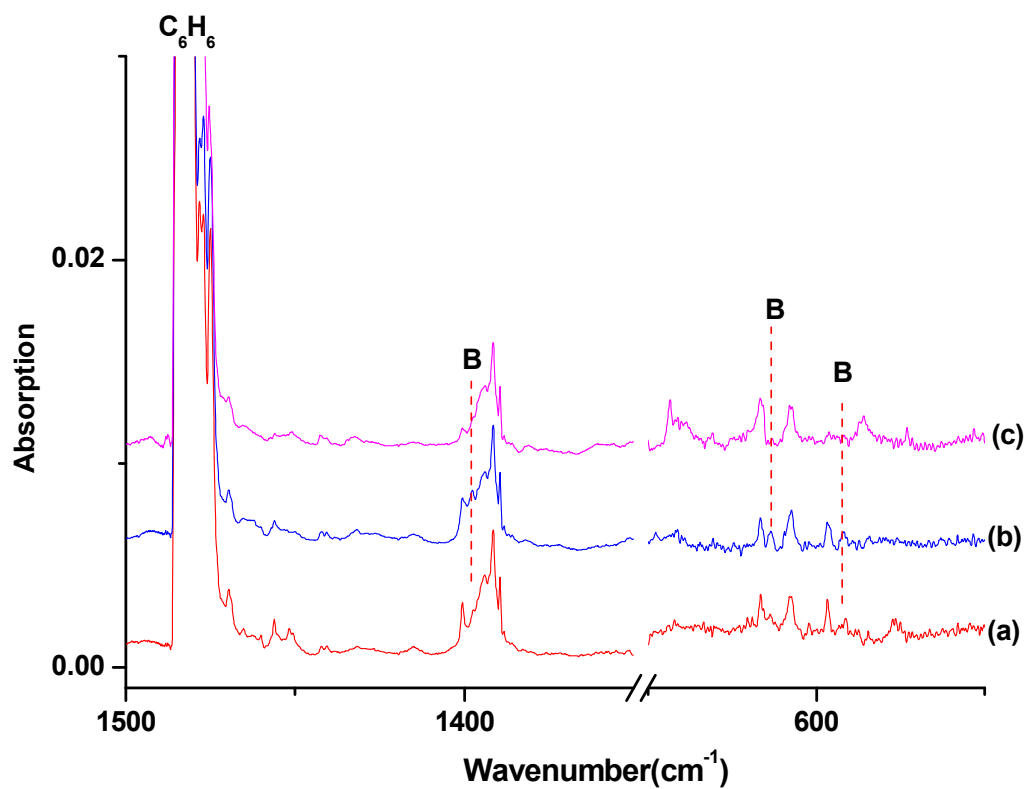

**Figure S1** Infrared spectra in the 1500-1350  $\text{cm}^{-1}$  and 650-550  $\text{cm}^{-1}$  region  $\text{cm}^{-1}$  from co-deposition of silicon atoms with 0.025 % benzene in solid neon. (a) afterwards annealing to 12 K, (b) after 15 min of UV-visible light ( $280 < \lambda < 580 \text{ nm}$ ) irradiation at 4K, (c) after 15 min of UV-visible light ( $250 < \lambda < 580 \text{ nm}$ ) irradiation at 4K.

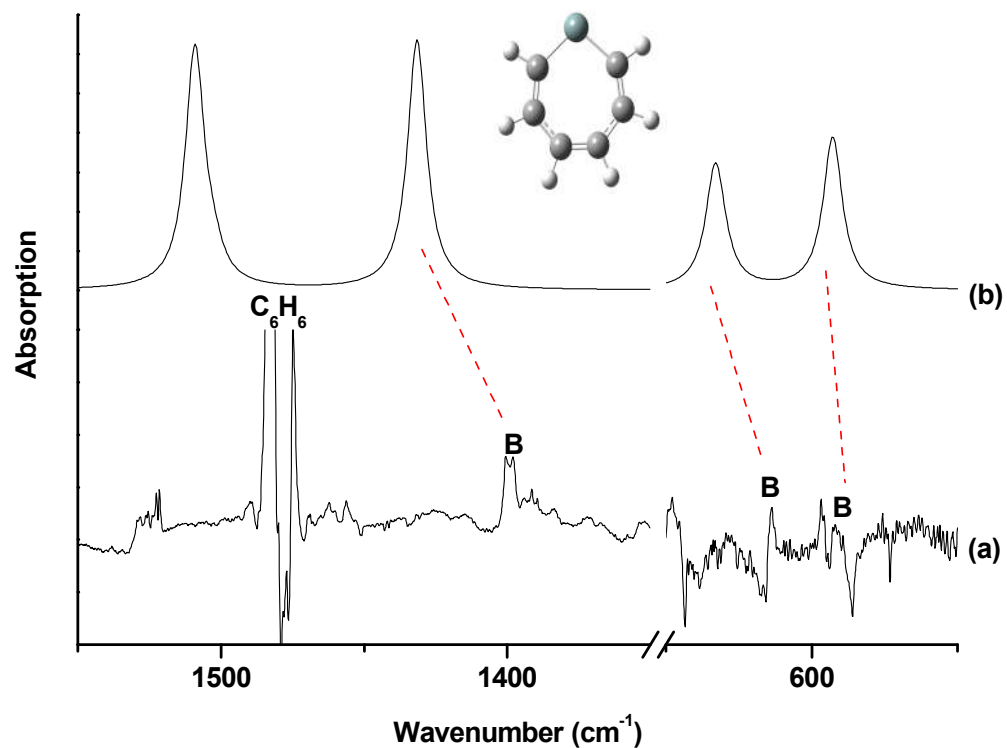

**Figure S2.** Infrared spectra in the 1550-1350  $\text{cm}^{-1}$  and 650-550  $\text{cm}^{-1}$  region from (a) spectra taken after 15 min full UV light irradiation minus spectrum after 15 min 280  $<\lambda <$  580 nm UV light irradiation; (b) calculated IR spectrum of 1-silacycloheptatrienylidene.



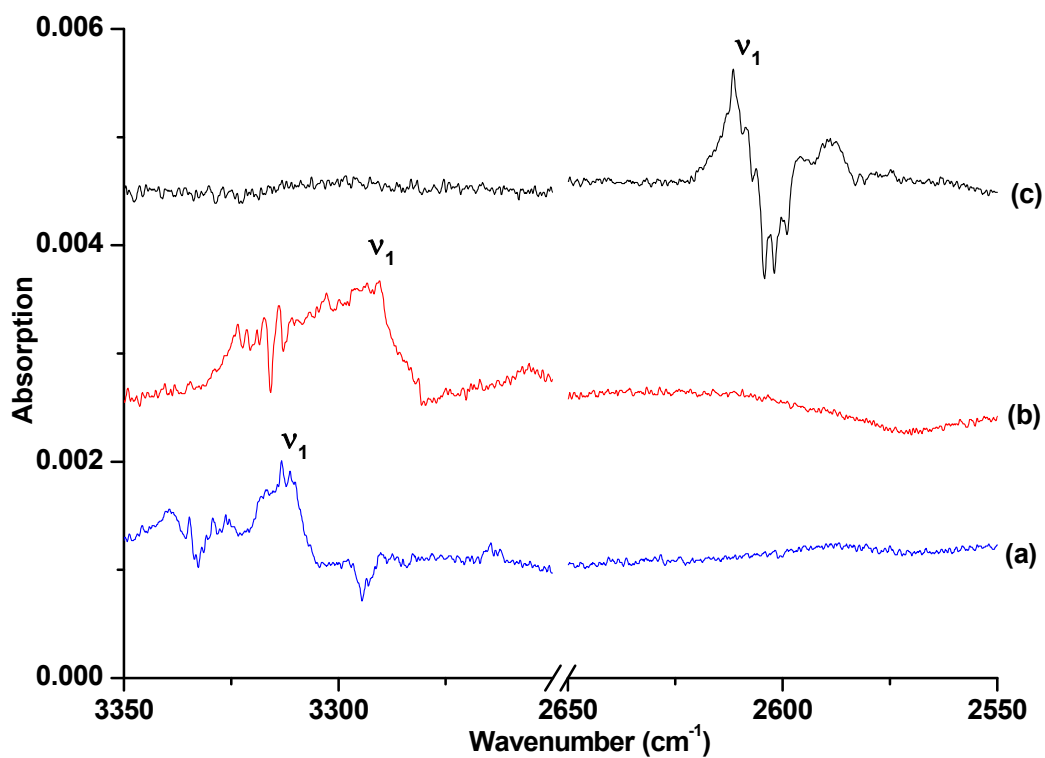

**Figure S3.** Infrared spectra in the 3350-3250 and 2650-2550 cm<sup>-1</sup> regions from co-deposition of silicon with isotopic labeled benzene in solid neon (spectra taken after 15 min full UV light irradiation minus spectrum after annealing to 12 K): (a) Si+0.025 % C<sub>6</sub>H<sub>6</sub>, (b) Si +0.025 % <sup>13</sup>C<sub>6</sub>H<sub>6</sub>, (d) Si +0.025 % C<sub>6</sub>D<sub>6</sub>.

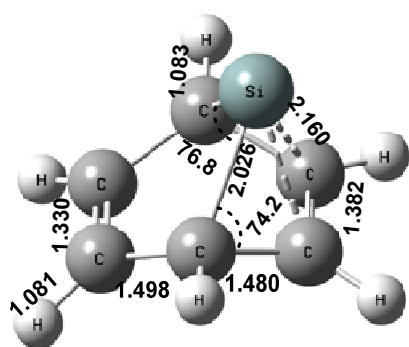

A,  $C_s$ ,  $^1A'$

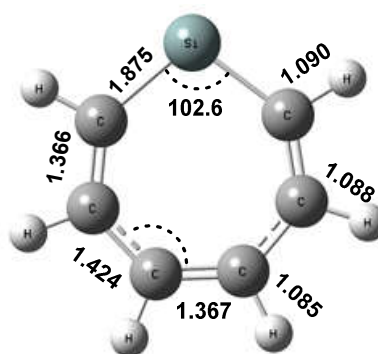

B,  $C_{2v}$ ,  $^1A_1$

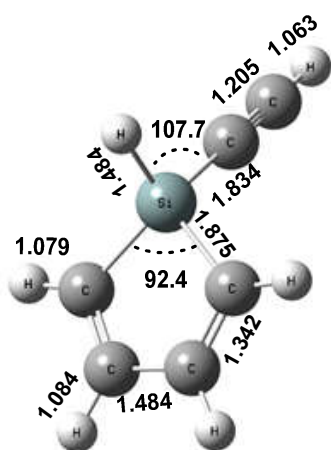

C,  $C_s$ ,  $^1A'$   
E=0 kJ mol<sup>-1</sup>

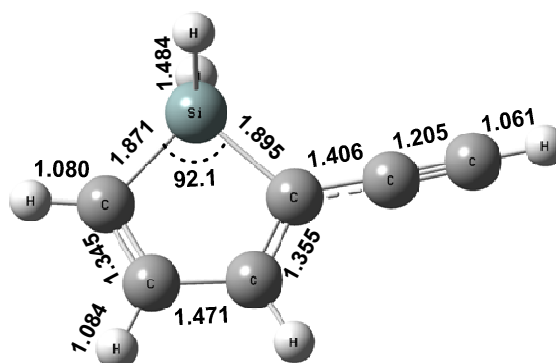

C-isomer1,  $C_s$ ,  $^1A'$   
E=23 kJ mol<sup>-1</sup>

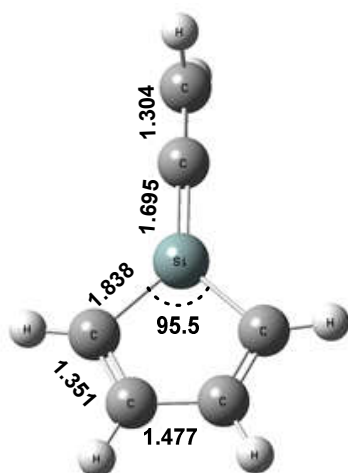

C-isomer2,  $C_{2v}$ ,  $^1A_1$   
E=61 kJ mol<sup>-1</sup>

**Figure S4.** Optimized structures and relative stabilities of singlet state species A-C and C-isomers at the B3LYP/aug-cc-pVTZ level. (bond lengths in angstrom and bond angles in degrees).

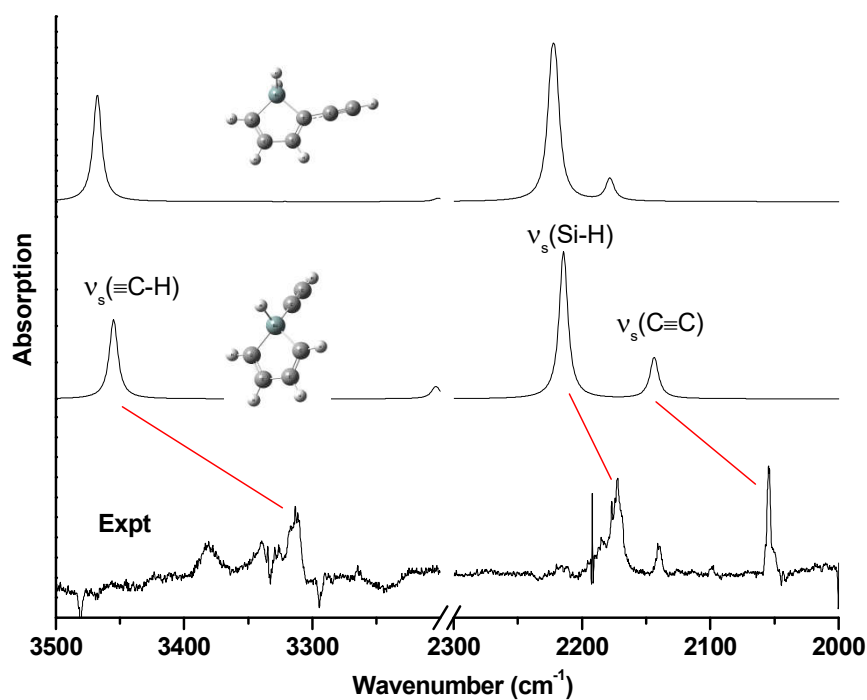

**Figure S5.** The experimental IR spectrum of 1-ethynyl-1H-silole in the solid neon matrix and its computed isomers spectrum (unscaled) in the 3500–2000  $\text{cm}^{-1}$  range ( $\nu_s$ - stretching vibration).

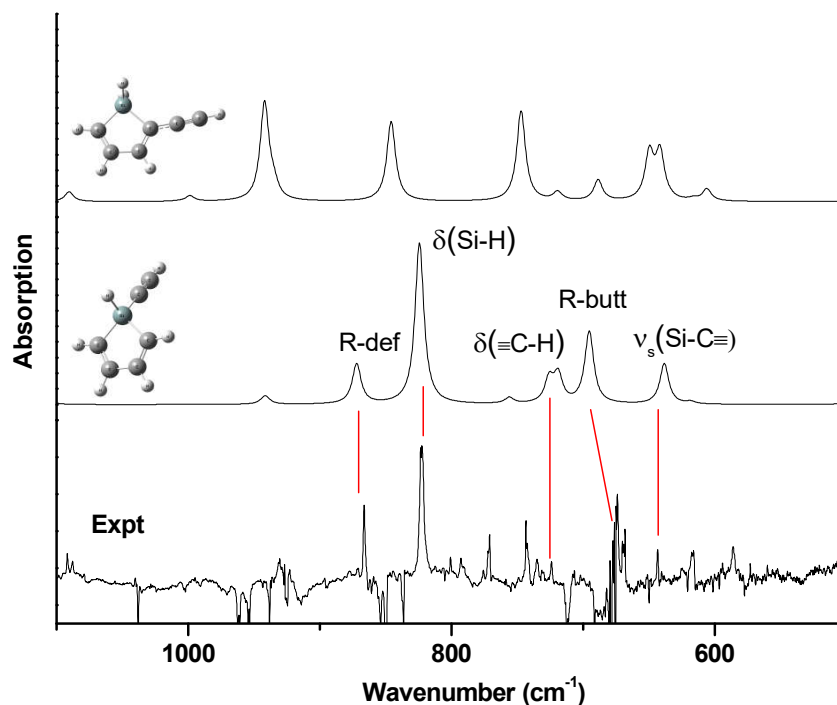

**Figure S6.** The experimental IR spectrum of 1-ethynyl-1H-silole in the solid neon matrix and its computed isomers spectrum (unscaled) in the 1100–500  $\text{cm}^{-1}$  range ( $\delta$ -wagging,  $\nu_s$ - stretching vibration, R-ring, def-deformation, butt-butterfly).

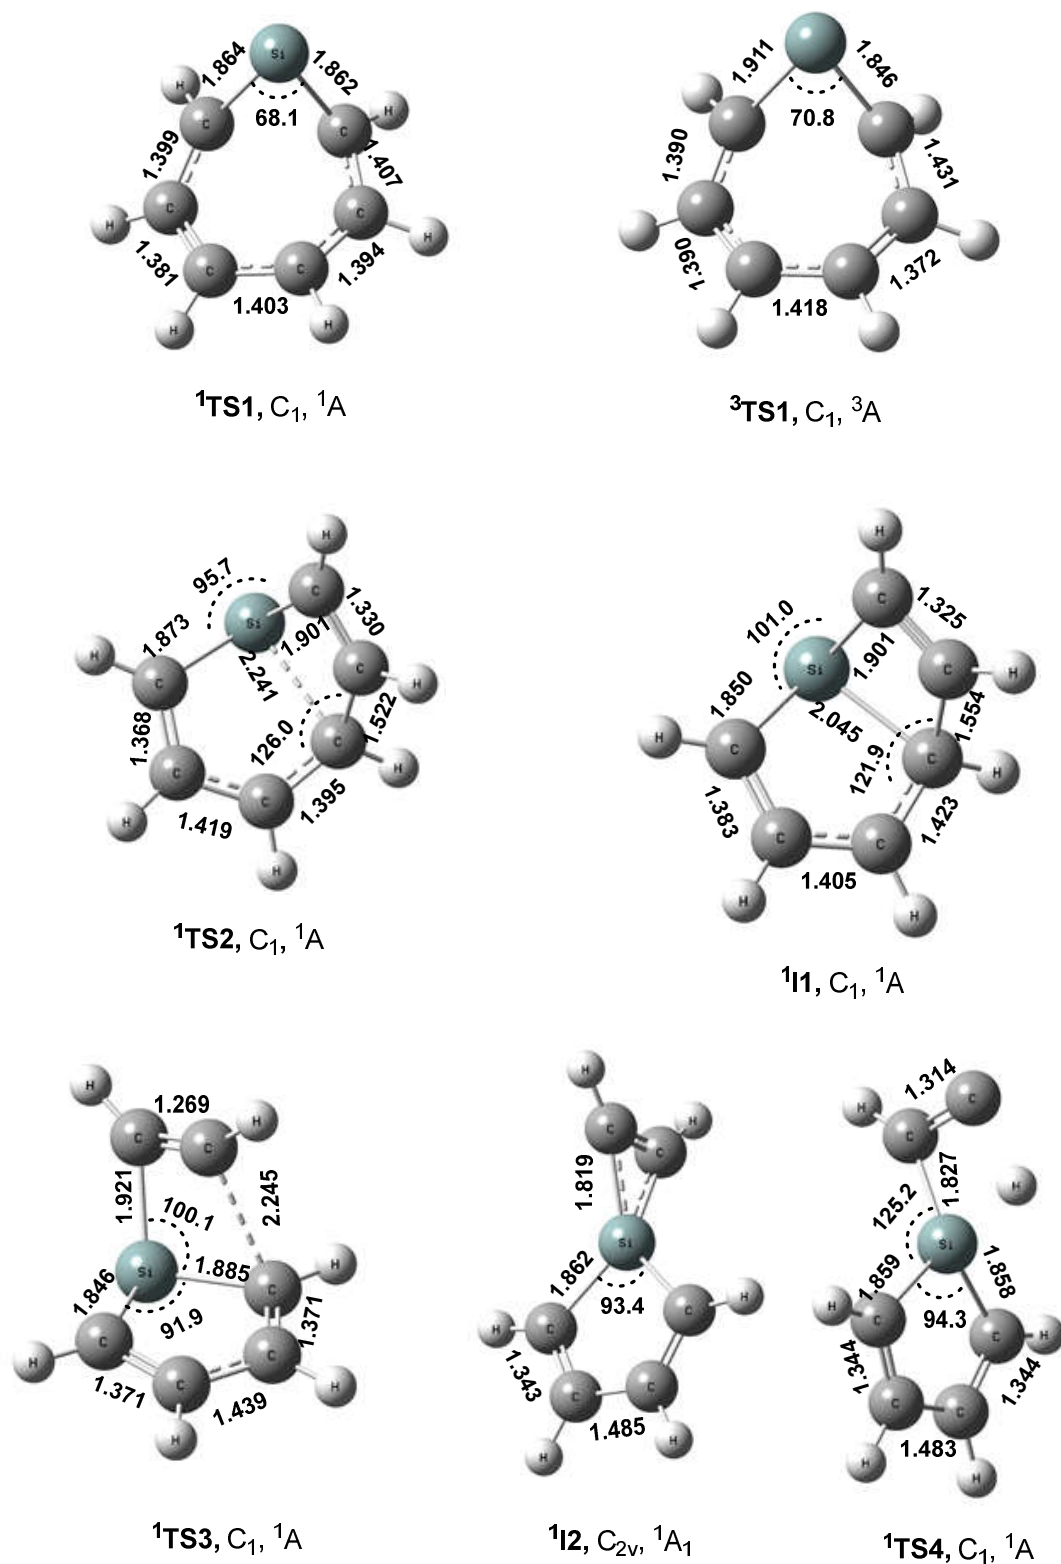

**Figure S7.** Optimized structures of the intermediates and transition states involved in the reaction pathways are shown in Figure 6. Bond lengths in angstroms and bond angles in degrees.

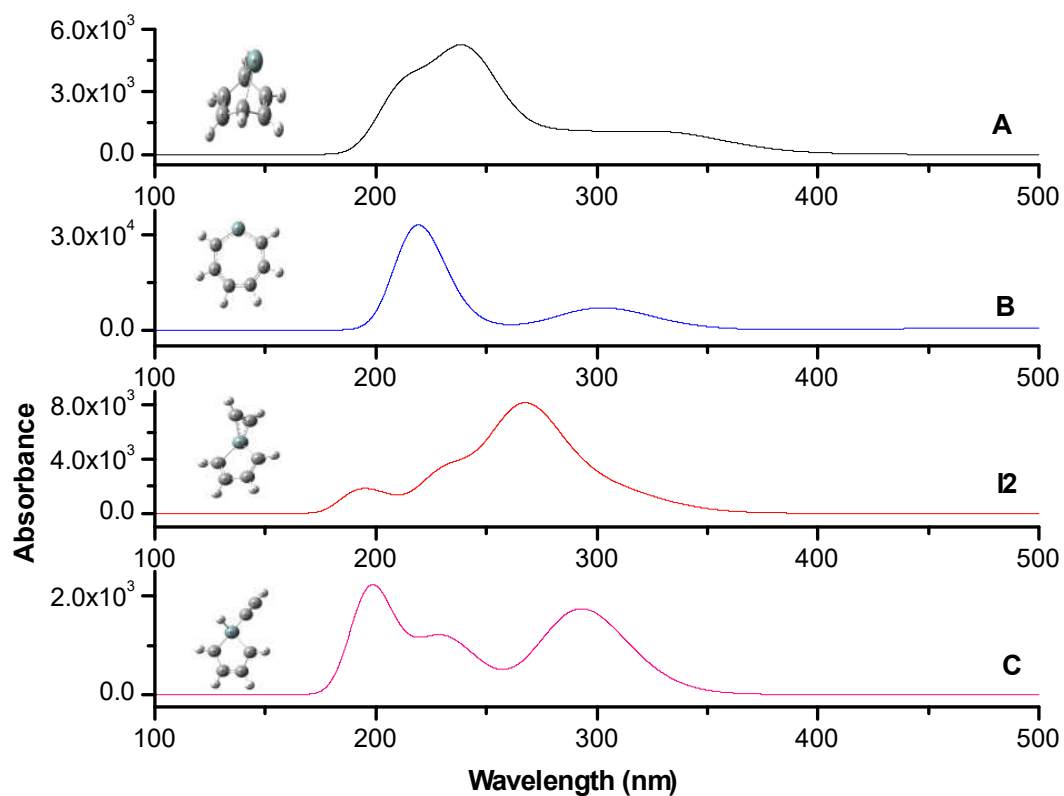

**Figure S8.** The calculated electronic absorptions spectra for the species **A**, **B**, **I<sub>2</sub>**, and **C** at the B3LYP/aug-cc-pVTZ level.

**Table S6.** Calculated atomic coordinates (in Angstroms) of SiC<sub>6</sub>H<sub>6</sub> isomers **A-C** and **C-isomer1** at the B3LYP/aug-cc-pVTZ level.

**A, (C<sub>s</sub>, <sup>1</sup>A')**

|    |             |             |             |
|----|-------------|-------------|-------------|
| C  | 0.03677900  | -1.56324000 | 0.66512900  |
| C  | 0.03677900  | -1.56324000 | -0.66512900 |
| C  | 0.03677900  | -0.18705700 | -1.25827400 |
| C  | -1.00418000 | 0.69951300  | -0.69076900 |
| C  | -1.00418000 | 0.69951300  | 0.69076900  |
| C  | 0.03677900  | -0.18705700 | 1.25827400  |
| H  | -0.05386600 | -2.44413500 | 1.28587900  |
| H  | -0.05386600 | -2.44413500 | -1.28587900 |
| H  | 0.19562300  | -0.09423100 | -2.32512100 |
| H  | -1.62090400 | 1.36491100  | -1.27901300 |
| H  | -1.62090400 | 1.36491100  | 1.27901300  |
| H  | 0.19562300  | -0.09423100 | 2.32512100  |
| Si | 1.00898300  | 1.06830900  | 0.00000000  |

**B, (C<sub>2v</sub>, <sup>1</sup>A<sub>1</sub>)**

|    |            |             |             |
|----|------------|-------------|-------------|
| C  | 0.00000000 | 0.68331100  | -1.73648700 |
| C  | 0.00000000 | -0.68331100 | -1.73648700 |
| C  | 0.00000000 | -1.63486100 | -0.67711800 |
| C  | 0.00000000 | 1.63486100  | -0.67711800 |
| C  | 0.00000000 | -1.46325800 | 0.67833800  |
| C  | 0.00000000 | 1.46325800  | 0.67833800  |
| H  | 0.00000000 | 2.66136800  | -1.03882500 |
| H  | 0.00000000 | 1.13144400  | -2.72416100 |
| H  | 0.00000000 | -1.13144400 | -2.72416100 |
| H  | 0.00000000 | -2.66136800 | -1.03882500 |
| H  | 0.00000000 | -2.41146000 | 1.21644000  |
| H  | 0.00000000 | 2.41146000  | 1.21644000  |
| Si | 0.00000000 | 0.00000000  | 1.85116400  |

**C, (C<sub>s</sub>, <sup>1</sup>A')**

---

|    |             |             |             |
|----|-------------|-------------|-------------|
| C  | 0.42120500  | -0.70872000 | 1.35316500  |
| C  | 0.42120500  | -1.90373900 | 0.74204600  |
| C  | 0.42120500  | -1.90373900 | -0.74204600 |
| C  | 0.42120500  | -0.70872000 | -1.35316500 |
| H  | 0.41970400  | -0.60129100 | 2.42758100  |
| H  | 0.41963700  | -2.84892100 | 1.27414800  |
| H  | 0.41963700  | -2.84892100 | -1.27414800 |
| H  | 0.41970400  | -0.60129100 | -2.42758100 |
| Si | 0.46083100  | 0.58824900  | 0.00000000  |
| C  | -0.96725700 | 1.73872000  | 0.00000000  |
| C  | -1.90140200 | 2.50080700  | 0.00000000  |
| H  | -2.72627700 | 3.17101800  | 0.00000000  |
| H  | 1.69899900  | 1.40626900  | 0.00000000  |

**C-isomer1, (C<sub>s</sub>, <sup>1</sup>A')**

---

|    |             |             |             |
|----|-------------|-------------|-------------|
| C  | -0.66460700 | -2.01003600 | 0.00000000  |
| C  | -1.67290300 | -1.11888200 | 0.00000000  |
| C  | -1.31905000 | 0.30858300  | 0.00000000  |
| C  | 0.00000000  | 0.61838200  | 0.00000000  |
| H  | -0.83467100 | -3.07645800 | 0.00000000  |
| H  | -2.71954800 | -1.40270900 | 0.00000000  |
| H  | -2.09643800 | 1.06357200  | 0.00000000  |
| Si | 0.93066400  | -1.03216200 | 0.00000000  |
| H  | 1.77162300  | -1.22567300 | 1.20724200  |
| H  | 1.77162300  | -1.22567300 | -1.20724200 |
| C  | 0.53715300  | 1.91766700  | 0.00000000  |
| C  | 1.05073700  | 3.00816800  | 0.00000000  |
| H  | 1.49013300  | 3.97392100  | 0.00000000  |
